# Supplementary material for: DCPO based nanoparticles as a near-infrared fluorescent probe for Cathepsin B
Source: Royal Society of Chemistry journal article supplement (doi:10.1039/c6ra14628g), 2016-01-01
Supplement: c6ra14628g1.pdf [file c6ra14628g1.pdf]

## Supporting Information

### DCPO based nanoparticles as near-infrared fluorescent probe for Cathepsin B

Bin Bao,<sup>a</sup> Yaqian Liu,<sup>a</sup> Lei Wang,<sup>a</sup> Wei Lu<sup>\*a,b</sup>

<sup>a</sup> School of Chemistry and Molecular Engineering, East China Normal University, 3663 North Zhongshan Road, Shanghai 200062, P. R. China.

<sup>b</sup> State Key Laboratory of Fine Chemicals, Dalian University of Technology, Dalian 116024, P. R. China.

#### CONTENTS:

1. Absorption spectra of DPCO and probe 1 S2
2. Emission spectra of DPCO and probe 1 S2
3. HPLC of CTB assay S3
4. Stability of probe 1 S3
5. <sup>1</sup>H-NMR and HR-MS S3

## 1. Absorption spectra of DPCO and probe 1

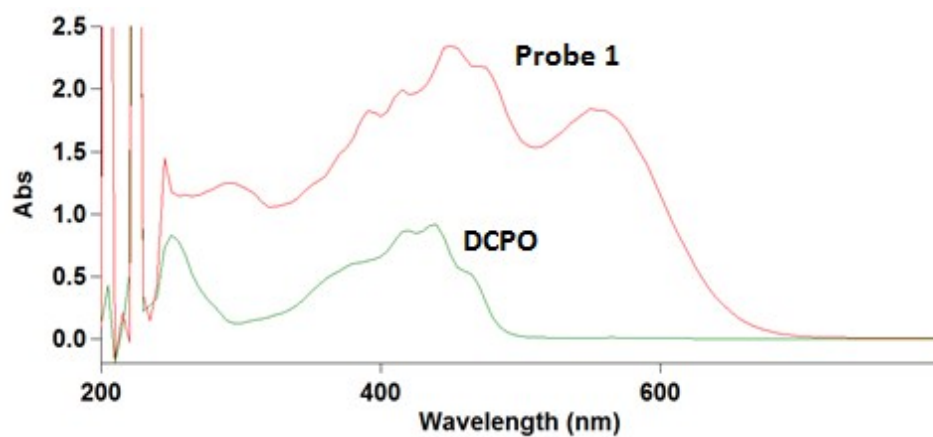

Figure S1 Absorption spectra of DPCO and probe 1 ( 50  $\mu$ M) in PBS buffer/DMSO (v/v=1/1, pH=7.4)

## 2. Emission spectra of DPCO and probe 1

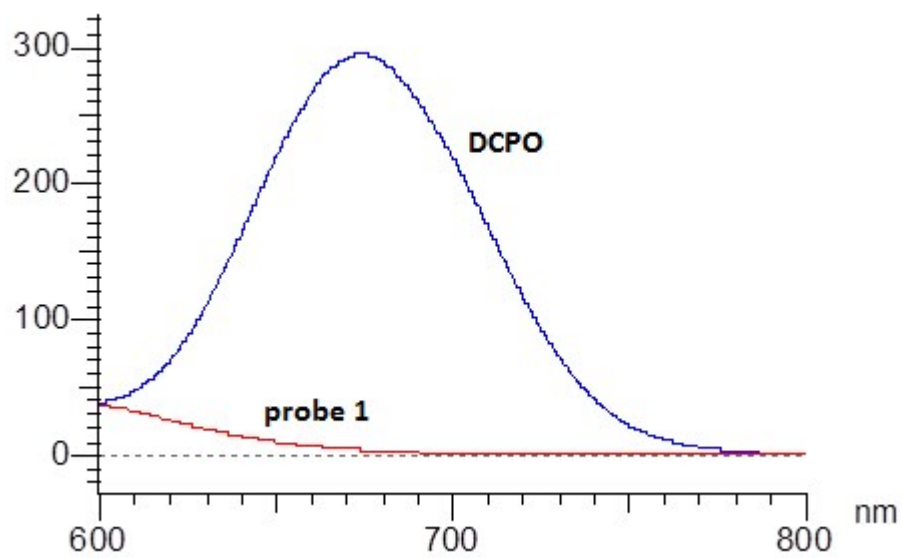

Figure S2 Emission spectra of DCPO and probe 1 (50  $\mu$ M) in PBS buffer/DMSO (v/v=1/1, pH=7.4)

### 3. HPLC of CTB assay

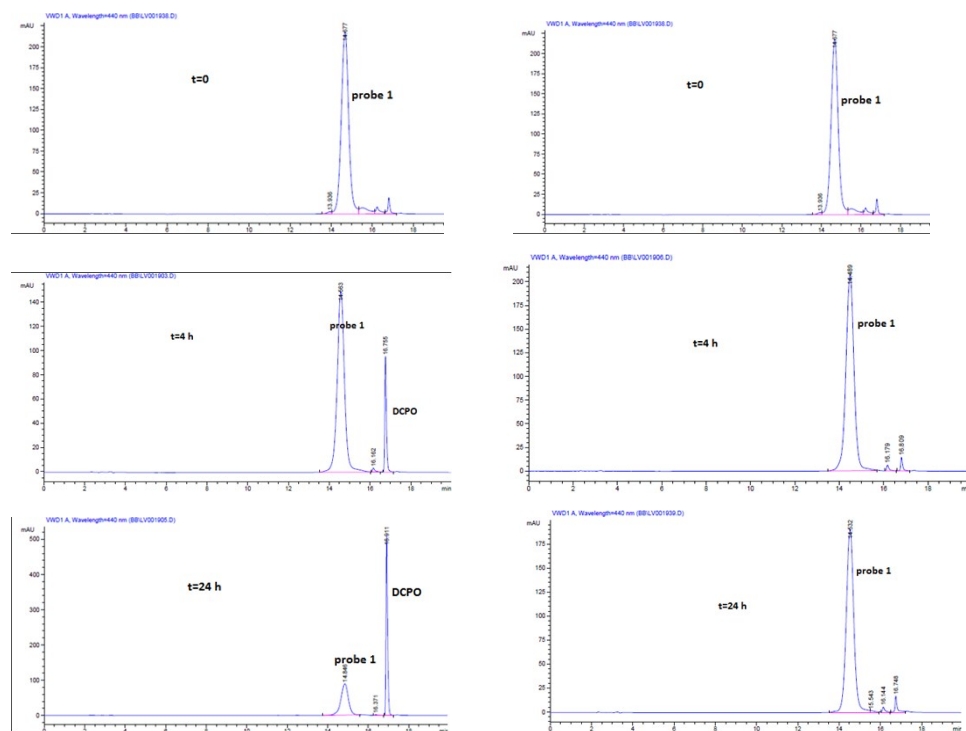

**Figure S3** HPLC of CTB assay: with CTB (left) and without CTB (right). Method: From 5% ACN/95% water to 95% ACN/5% water in 20 min.

### 4. Stability of probe 1 in PBS

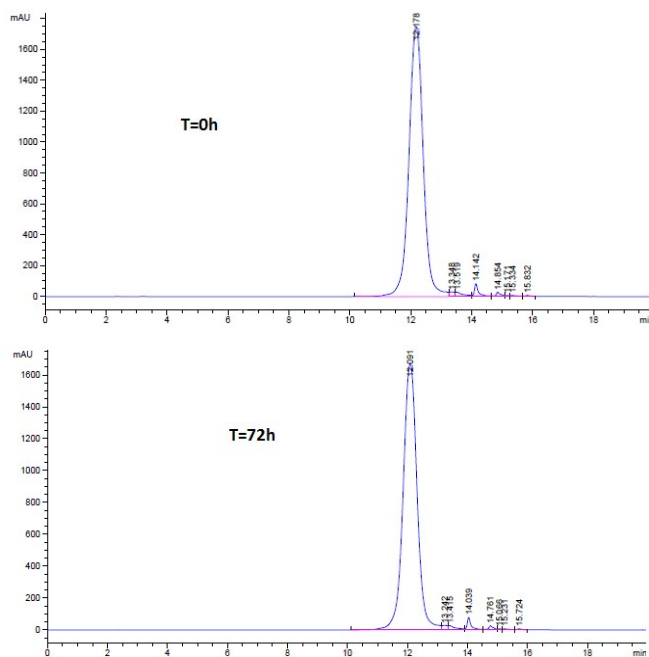

**Figure S4** Stability of **probe 1** in PBS(pH=7.4, 10 mM). Method: From 10% ACN/90% water to 95% ACN/5% water in 20 min.

### 4. $^1\text{H}$ NMR and $^{13}\text{C}$ NMR spectra

**Figure S5.**  $^1\text{H}$  NMR Spectrum of compound 3 (400 MHz,  $\text{DMSO}-d_6$ )

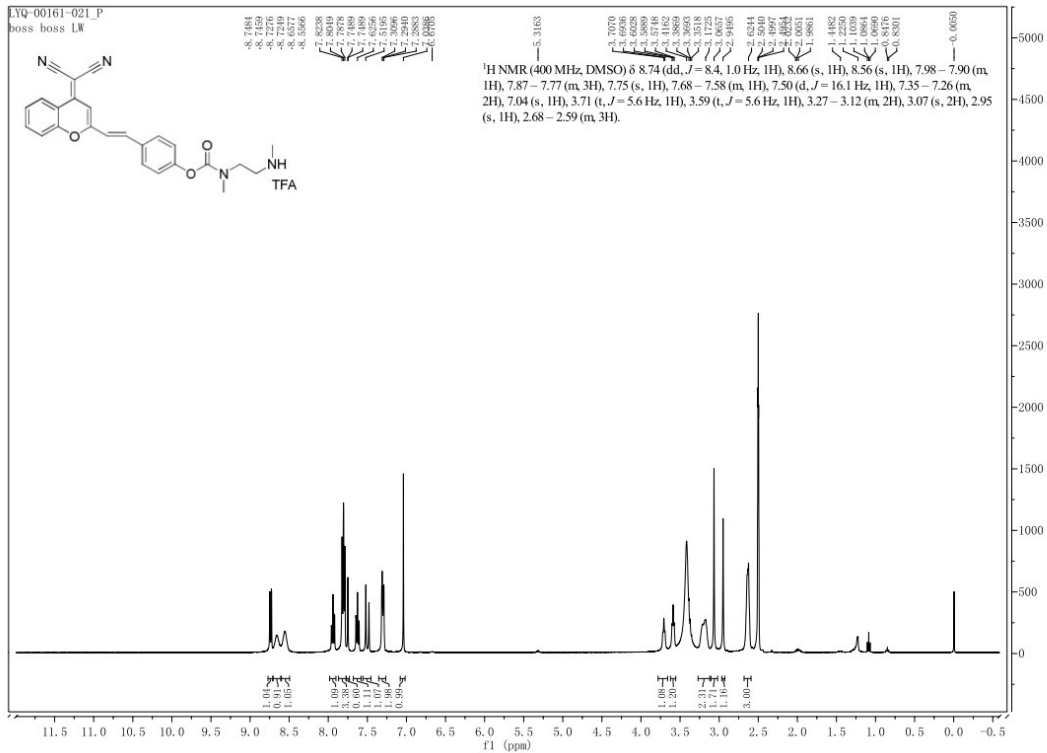

Figure S6. <sup>13</sup>C NMR Spectrum of compound 3 (100 MHz, DMSO-*d*<sub>6</sub>)

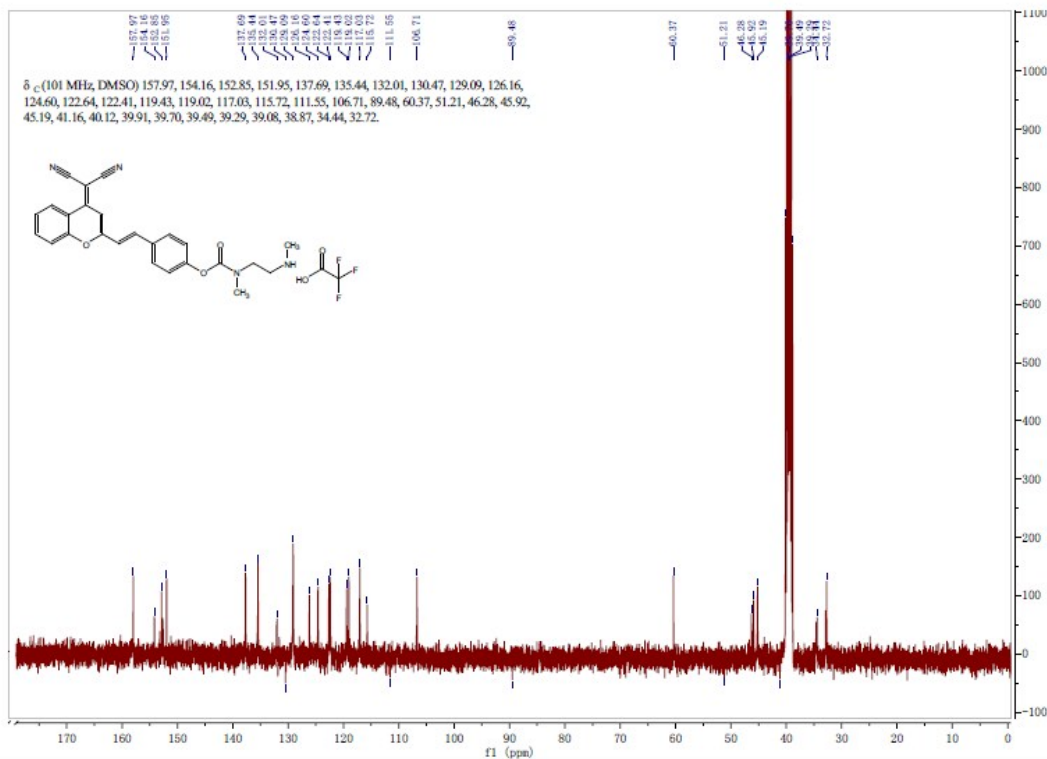

Figure S7. <sup>13</sup>C NMR Spectrum of compound 5 ((400 MHz, DMSO-*d*<sub>6</sub>)

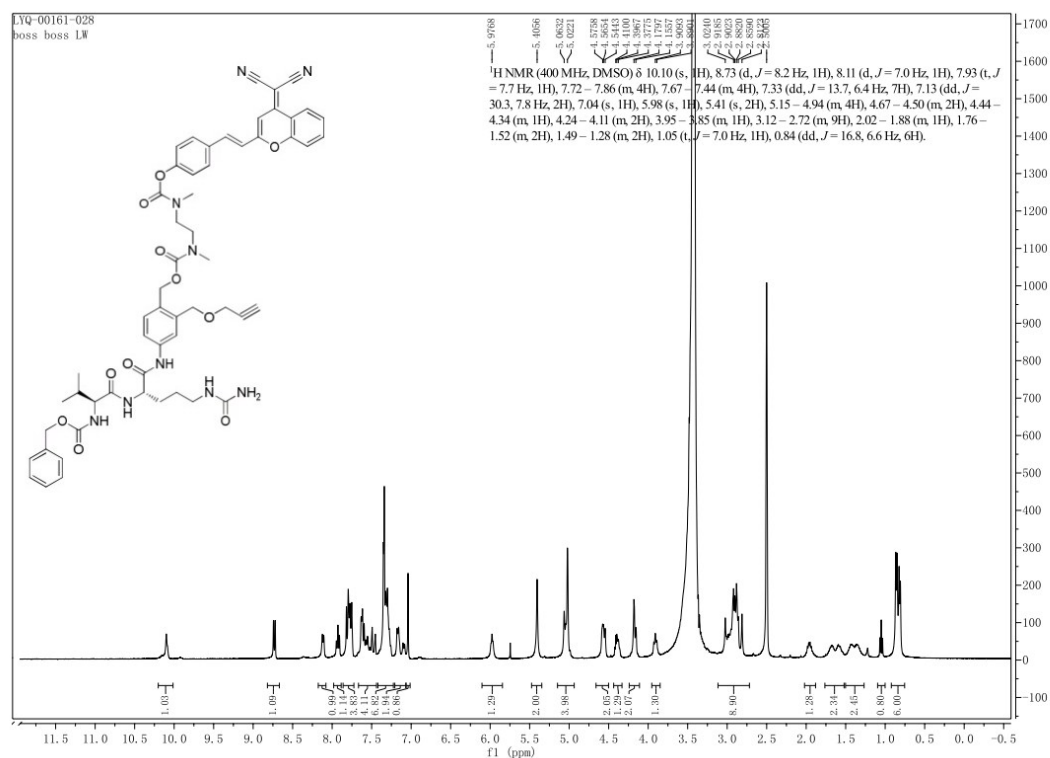

**Figure S8.**  $^{13}\text{C}$  NMR Spectrum of compound compound 5 ((400 MHz, DMSO- $d_6$ )

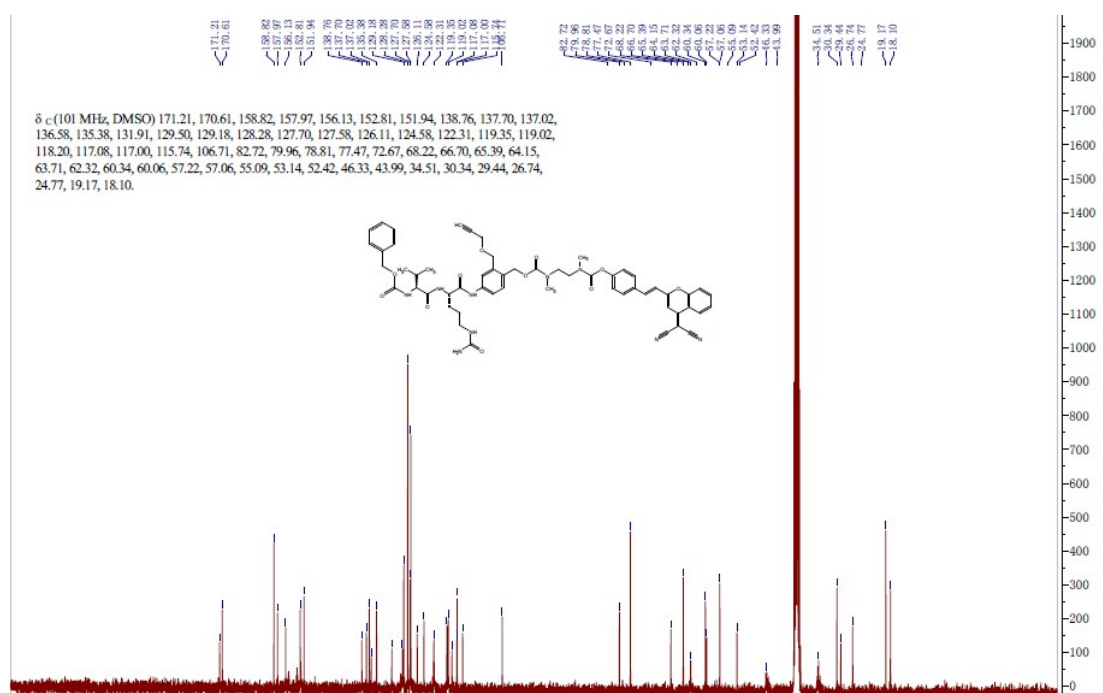

**Figure S9.**  $^1\text{H}$  NMR Spectrum of probe 1 ((400 MHz, DMSO- $d_6$ )

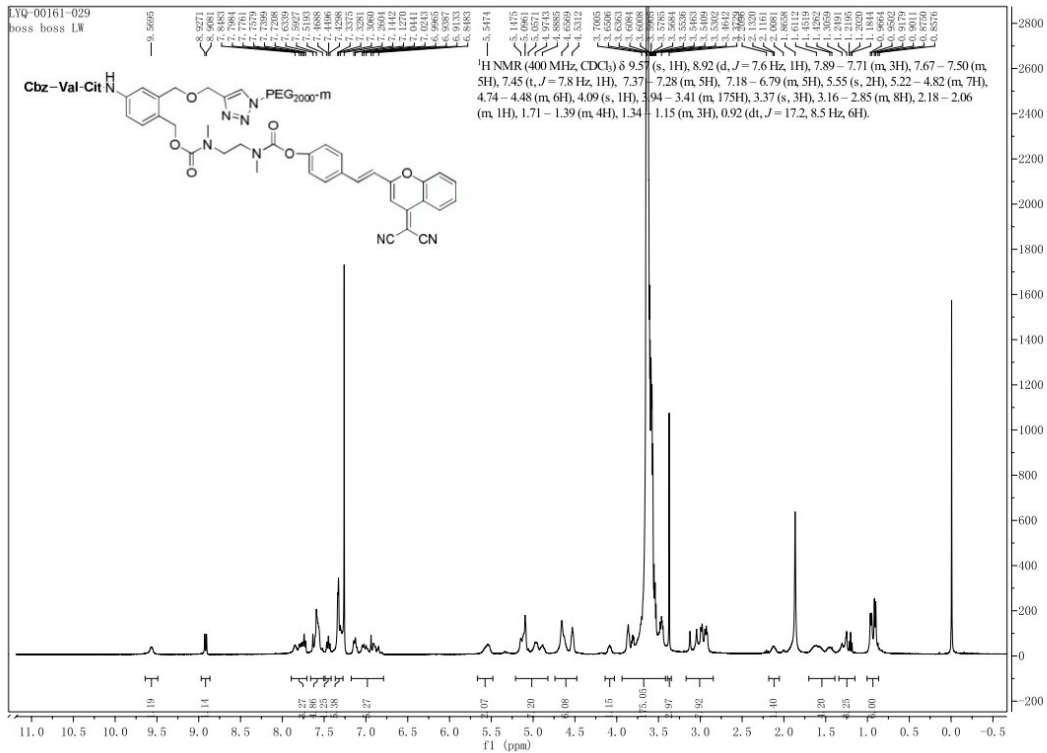

Figure S10. HR-MS of compound 5

### Elemental Composition Report

Page 1

#### Single Mass Analysis

Tolerance = 1000.0 PPM / DBE: min = -1.5, max = 50.0

Element prediction: Off

Number of isotope peaks used for i-FIT = 3

Monoisotopic Mass, Even Electron Ions

3 formula(e) evaluated with 1 results within limits (up to 50 closest results for each mass)

Elements Used:

C: 56-56 H: 53-62 N: 9-9 O: 11-11 Na: 0-1 I: 0-1

LYQ-00161-028-1C 14 (0.796)

1: TOF MS ES+

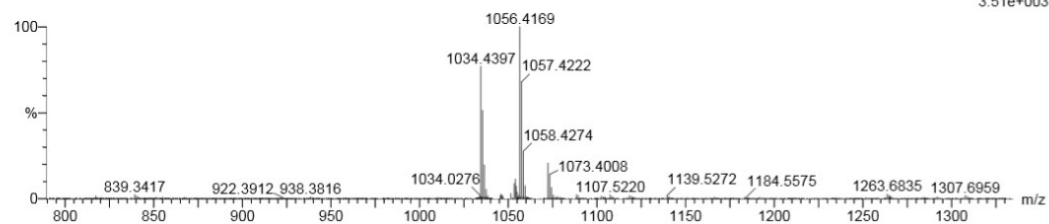

Minimum:

Maximum: 500.0 1000.0 -1.5

| Mass      | Calc. Mass | mDa  | PPM  | DBE  | i-FIT | i-FIT (Norm) | Formula        |
|-----------|------------|------|------|------|-------|--------------|----------------|
| 1034.4397 | 1034.4412  | -1.5 | -1.5 | 31.5 | 35.4  | 0.0          | C56 H60 N9 O11 |
